# Supplementary material for: General and species-specific transcriptional responses to downy mildew infection in a susceptible (Vitis vinifera) and a resistant (V. riparia) grapevine species
Source: Springer Nature journal article supplement (doi:10.1186/1471-2164-11-117), 2010-02-18

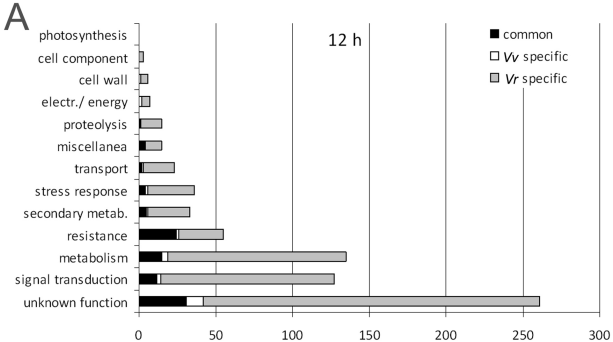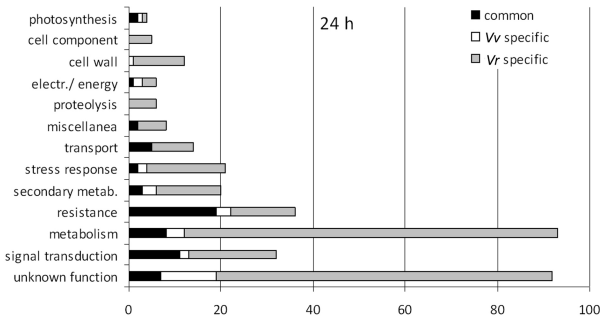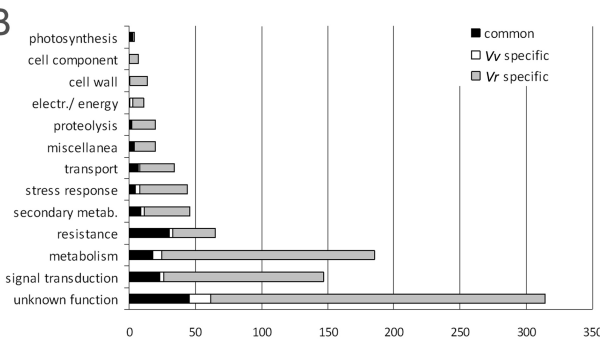

Supplement: 12864_2009_2711_MOESM13_ESM.pdf [file 12864_2009_2711_MOESM13_ESM.pdf]
